# Supplementary material
Source: MDPI journal article supplement (https://www.mdpi.com/1424-2818/9/1/16)
Supplement: s1 [file s1]

# Microsatellites Reveal Genetic Homogeneity among Outbreak Populations of Crown-of-Thorns Starfish (*Acanthaster cf. solaris*) on Australia's Great Barrier Reef

Hugo B. Harrison <sup>1,\*</sup>, Morgan S. Pratchett <sup>1</sup>, Vanessa Messmer <sup>1</sup>, Pablo Saenz-Agudelo <sup>2</sup> and Michael L. Berumen <sup>3</sup>

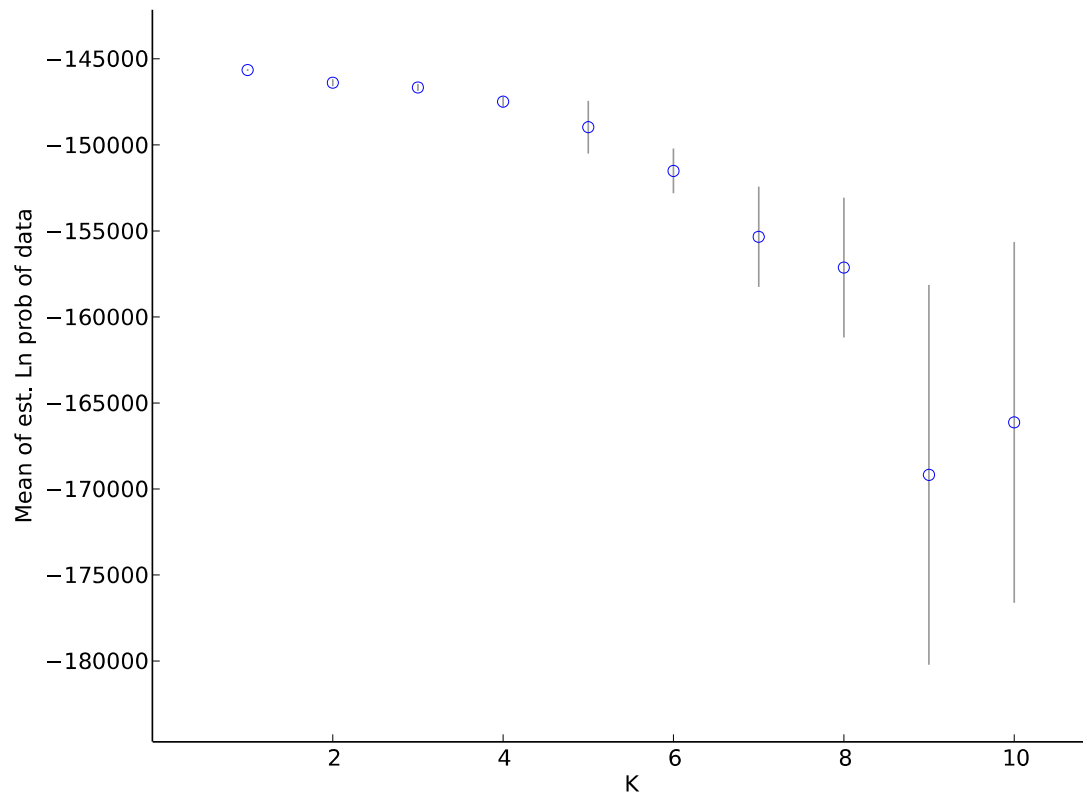

**Figure S1.** Mean likelihood probability of describing the population structure of CoTS in the Great Barrier Reef into K clusters with standard deviation around the mean. Three runs were performed for each value of K and compiled in Structure Harvester (Earl et al. [1]).

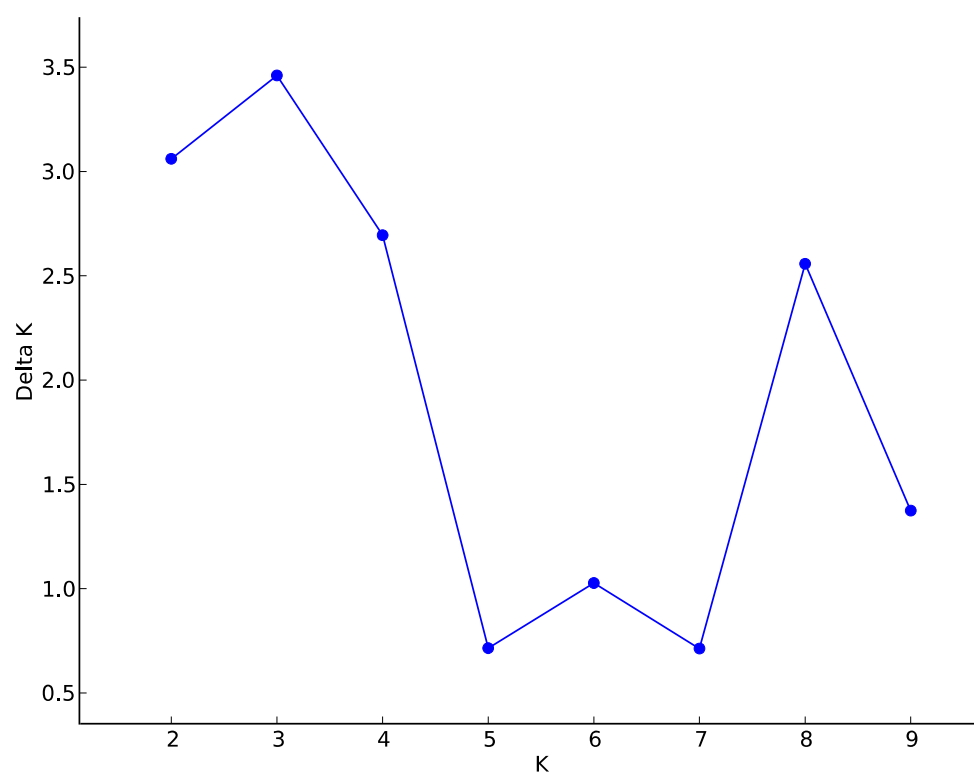

**Figure S2.** Change in the mean likelihood probability of K clusters describing the population structure of CoTS in the Great Barrier Reef. Three runs were performed for each value of K and compiled in Structure Harvester (Earl et al. [1]).

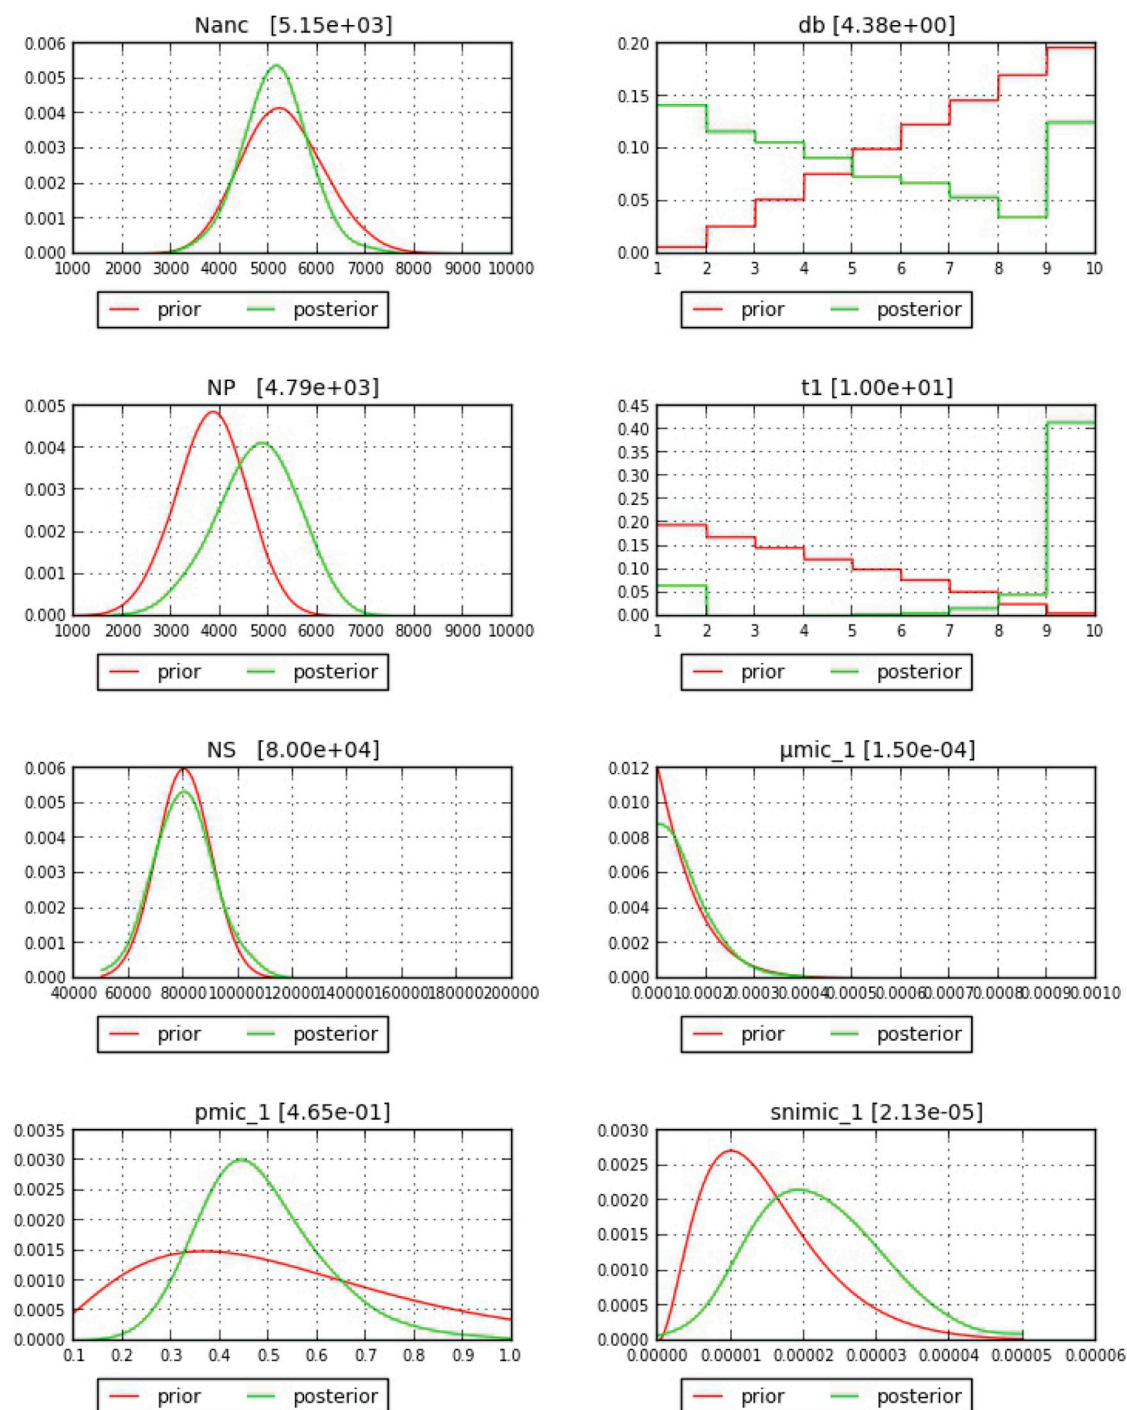

**Figure S3.** Parameter posterior density estimates from Scenario 4. Nanc: the effective population size of an ancestral population. NP and NS correspond to  $N_{\text{prim}}$  and  $S_{\text{amp}}$  in table 5, the the effective population size of the primary and secondary outbreaks, respectively. t1: the divergence time of outbreaks. db: the foundation time of primary outbreaks. All time priors are represented in number of generations.  $\mu_{\text{mic}}$ : the mean mutation rate. pmic the mean distribution of the number of repeats of microsatellite markers. snimic: mean rate of single nucleotide insertions and deletions.

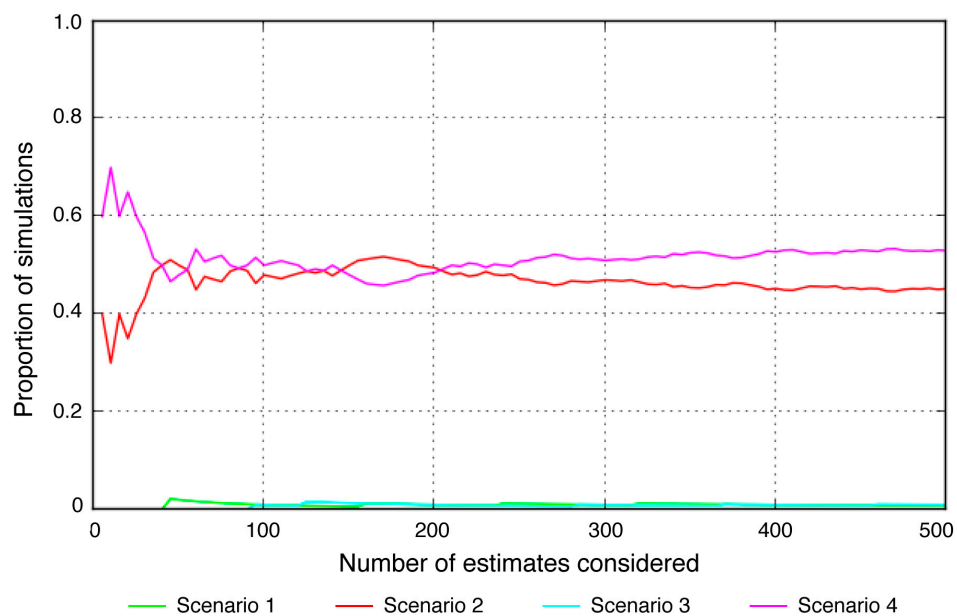

**Figure S4.** Comparing the posterior probabilities of modelled scenarios using direct estimates – the number of times a given scenario is chosen to best represents the observed data.

## References

1. Earl, D.A.; vonHoldt, B.M. STRUCTURE HARVESTER: A website and program for visualizing STRUCTURE output and implementing the Evanno method. *Conserv. Genet. Res.* **2012**, *4*, 359.
